# Supplementary material for: The eukaryotic translation elongation factor 1A regulation of actin stress fibers is important for infectious RSV production
Source: Springer Nature journal article supplement (doi:10.1186/s12985-018-1091-7), 2018-11-26
Supplement: MOESM1 [file 16295748]

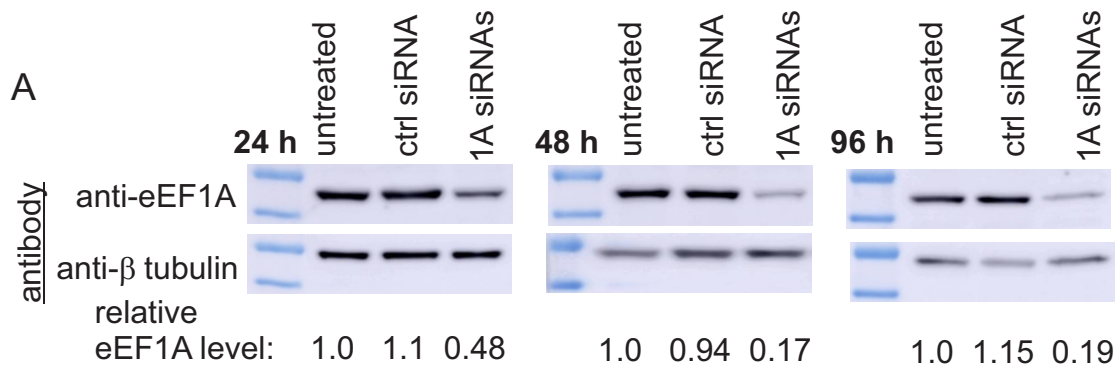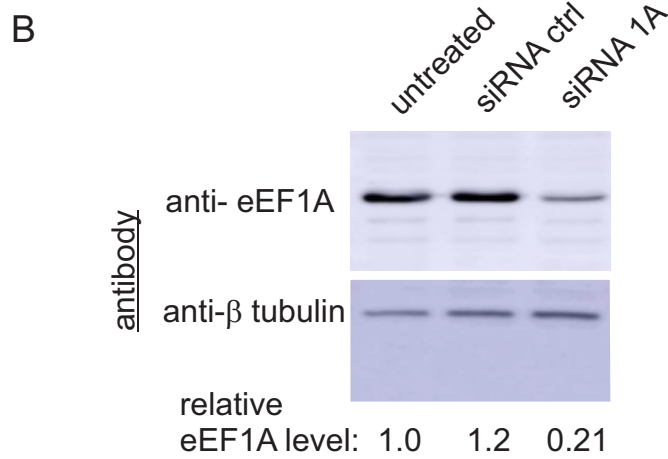

**Additional file 1. Western blot analysis of cell lysates prepared from cells treated as indicated.** The relative level of eEF1A was normalised to  $\beta$ -tubulin in the same sample by analysis of digital images using ImageJ software. The experiments were repeated three times with similar results and representative results are shown.
